# Supplementary material for: Oxygen defect based cobalt-doped-NiMoO4 hierarchical hollow nanosheet-based-nanosphere for oxygen evolution reaction
Source: Royal Society of Chemistry journal article supplement (doi:10.1039/d4nj00659c), 2024-01-01
Supplement: d4nj00659c1.pdf [file d4nj00659c1.pdf]

## Supporting Information

### **Oxygen defect based Cobalt-doped-NiMoO<sub>4</sub> Hierarchical hollow nanosheet-based-nanosphere for oxygen evolution reaction**

Zhuoxun Yin,<sup>\*,a</sup> Min Zhou,<sup>a</sup> Xiping Li,<sup>a</sup> Xiangcun Liu,<sup>a</sup> Xinzhi Ma,<sup>\*,b</sup> Yang Zhou,<sup>\*,c</sup> Wei Chen,<sup>a</sup> Jinlong Li,<sup>a</sup> Lina Liu,<sup>a</sup> Jun Lv<sup>a</sup>

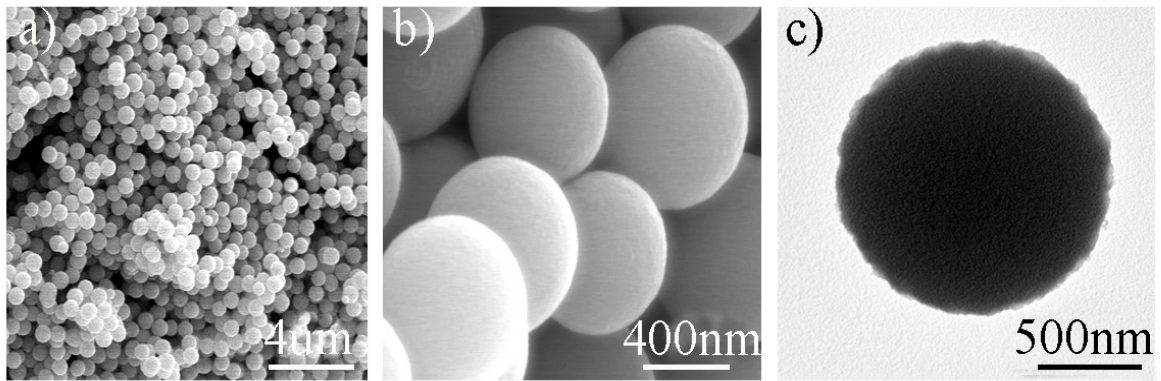

**Figure S1** a,b)SEM image of MoEG c) TEM image of MoEG.

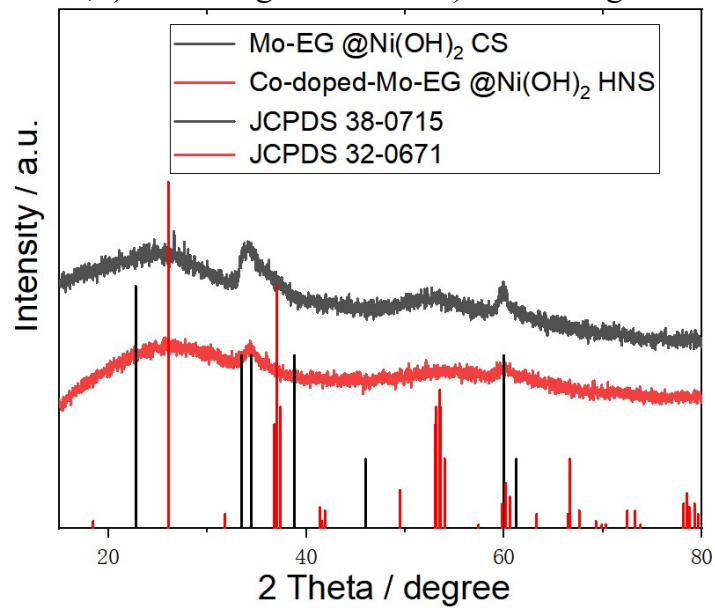

**Figure S2** XRD patterns of Mo-EG @Ni(OH)<sub>2</sub> CS and Co-doped-Mo-EG @Ni(OH)<sub>2</sub> HNS

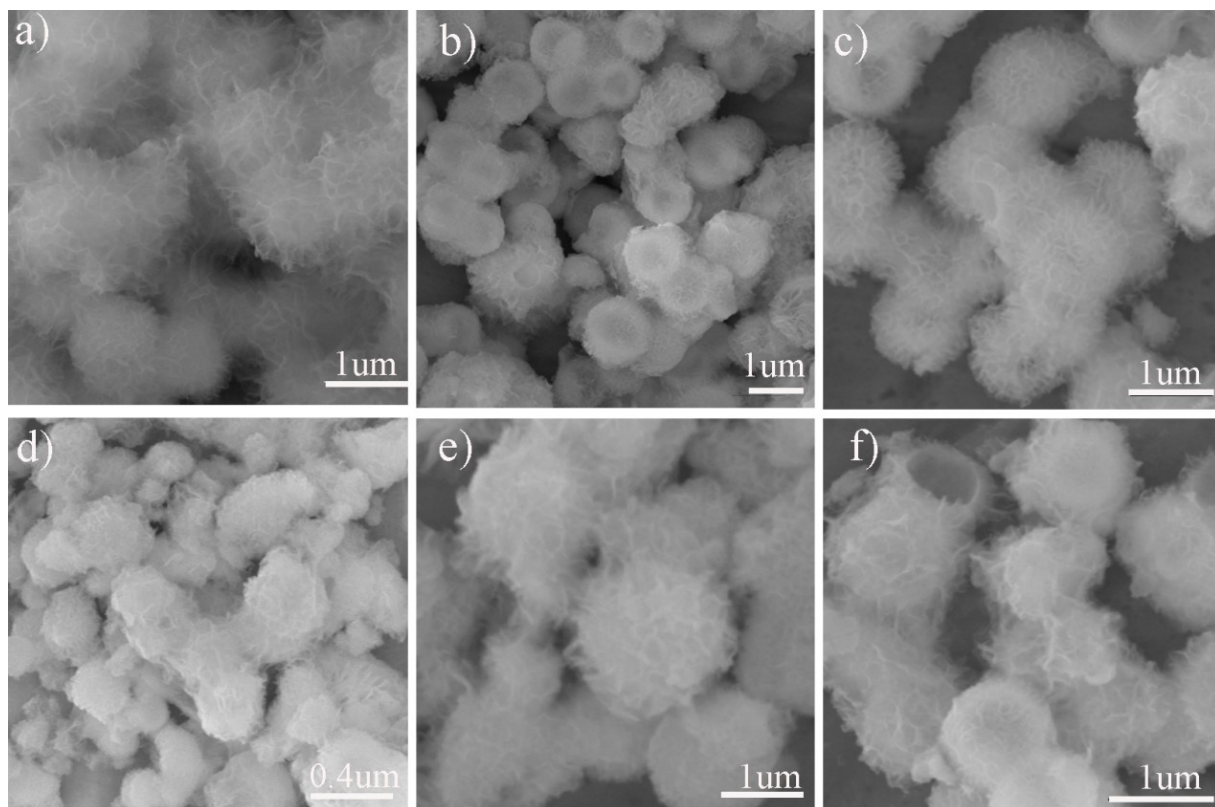

**Figure S3** SEM images of the powder samples prepared at a) NiMo-EG b) Co<sub>1</sub>-NiMo<sub>4</sub>-HNS, c)Co<sub>1.5</sub>-NiMo<sub>4</sub>-HNS, d) Co<sub>2</sub>-NiMo<sub>4</sub>-HNS, e) Co<sub>4</sub>-NiMo<sub>4</sub>-HNS, and f)Co<sub>6</sub>-NiMo<sub>4</sub>-HNS.

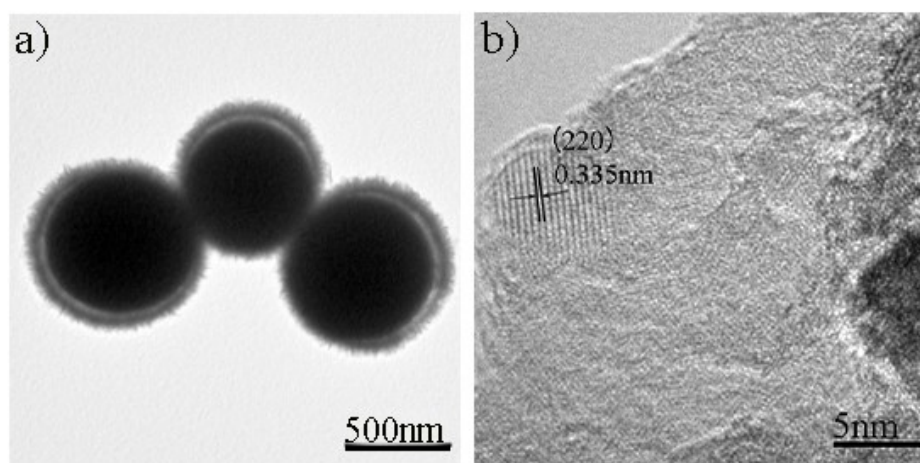

**Figure S4** TEM images of NiMoO<sub>4</sub>-CS catalysts. a) Low-magnification TEM image, and b) HRTEM image. shows the interplanar distances at marked regions.

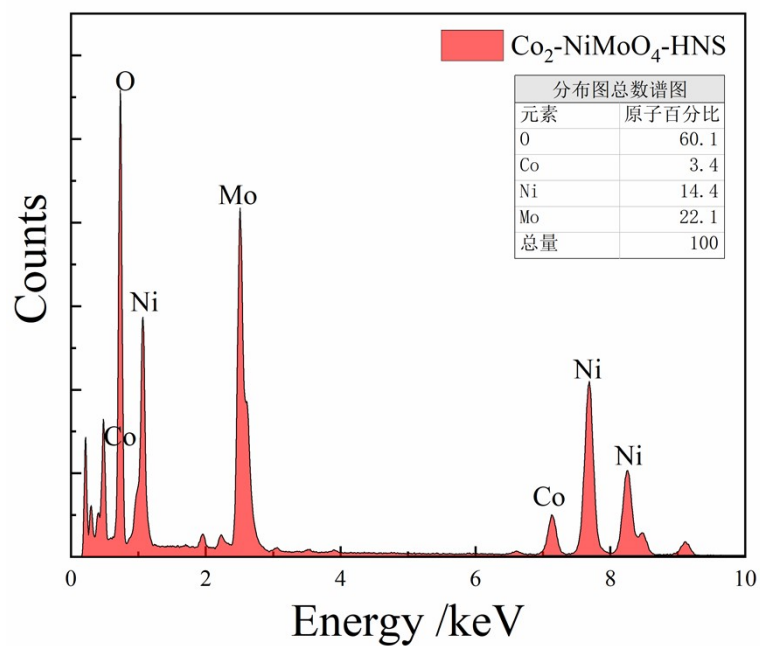

Figure S5 The EDX pattern of the Co<sub>2</sub>-NiMoO<sub>4</sub>-HNS.

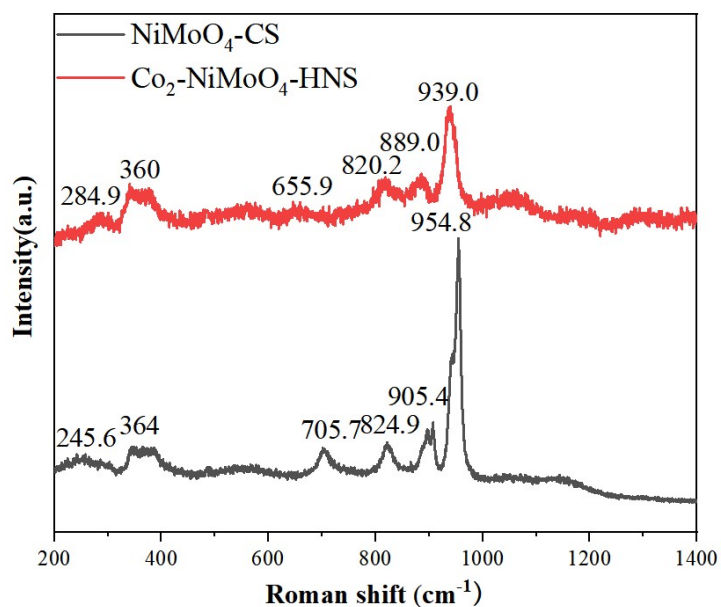

Figure S6 Raman spectra of NiMoO<sub>4</sub> (black) and Co<sub>2</sub>-NiMoO<sub>4</sub>-HNS (red).

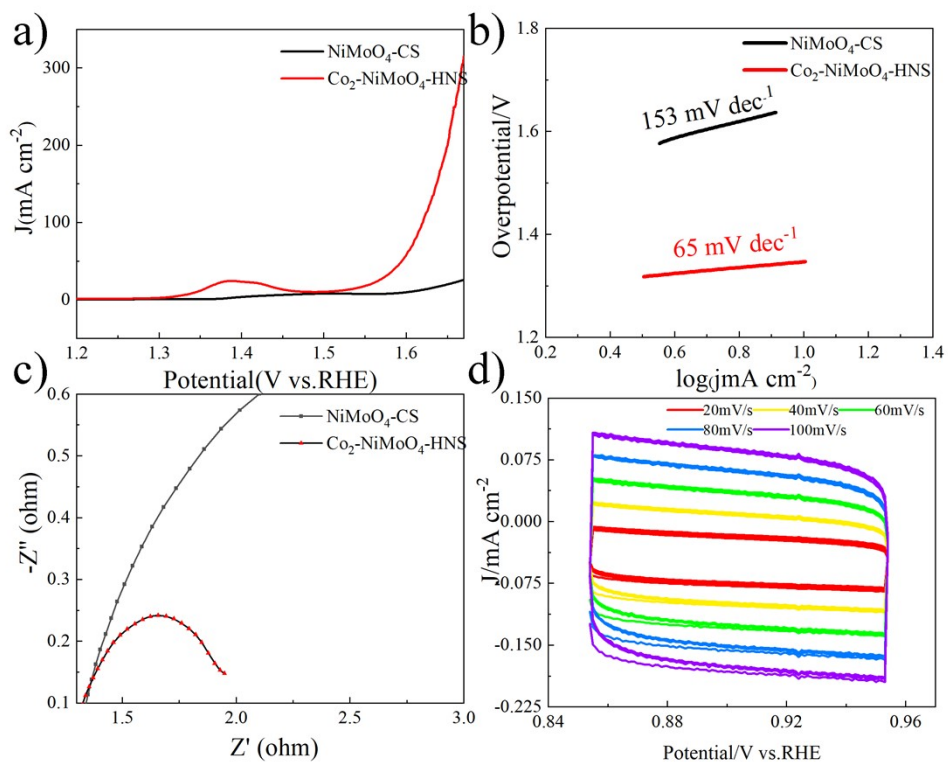

**Figure S7** a) The OER polarization curves of  $\text{Co}_2\text{-NiMoO}_4\text{-HNS}$  and  $\text{NiMoO}_4\text{-CS}$  in 1.0 M KOH. b) The corresponding Tafel plots of  $\text{Co}_2\text{-NiMoO}_4\text{-HNS}$  and  $\text{NiMoO}_4\text{-CS}$  c) Nyquist plot representations of the electrochemical impedance spectra of  $\text{Co}_2\text{-NiMoO}_4\text{-HNS}$  and  $\text{NiMoO}_4\text{-CS}$ . d) The CV curves of  $\text{Co}_2\text{-NiMoO}_4\text{-HNS}$ .

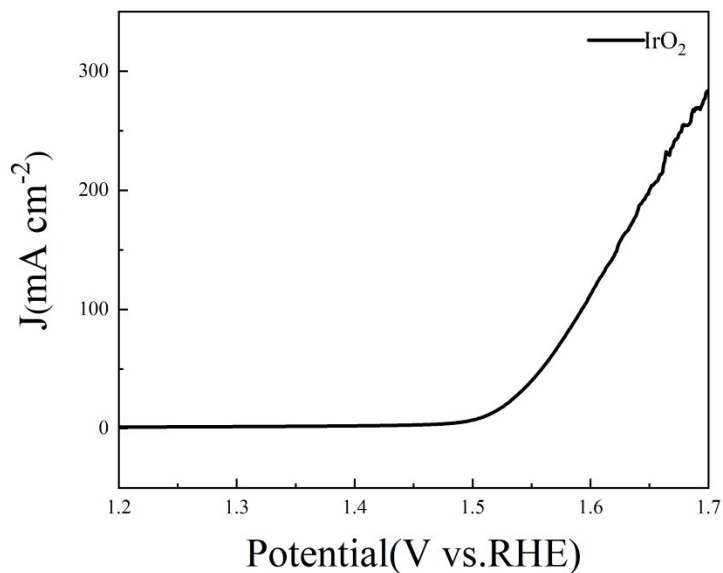

**Figure S8** The OER polarization curves of  $\text{IrO}_2$ .

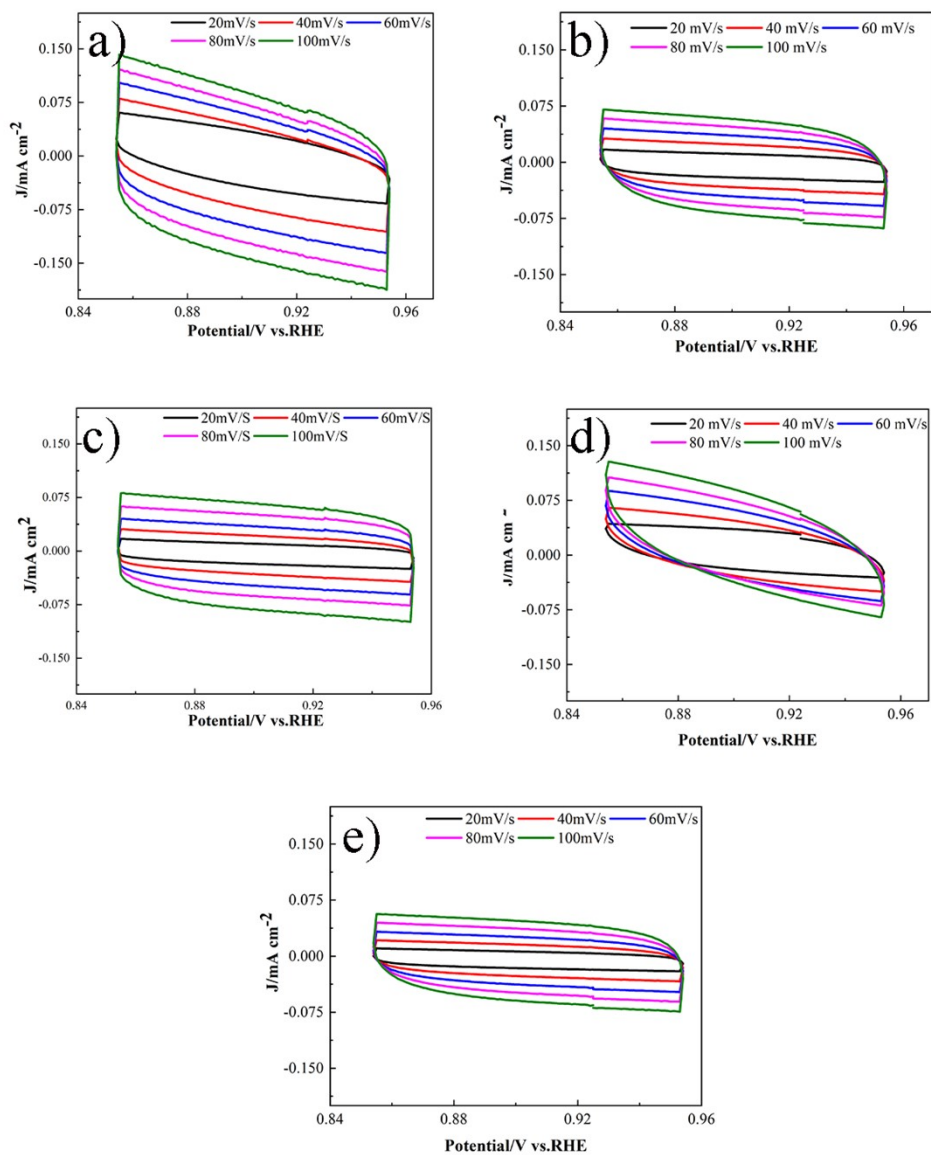

**Figure S9** The CV curves of a)  $\text{Co}_1\text{-NiMoO}_4\text{-HNS}$ , b)  $\text{Co}_{1.5}\text{-NiMoO}_4\text{-HNS}$ , c)  $\text{Co}_2\text{-NiMoO}_4\text{-HNS}$ , d)  $\text{Co}_4\text{-NiMoO}_4\text{-HNS}$ , (e)  $\text{Co}_6\text{-NiMoO}_4\text{-HNS}$ .

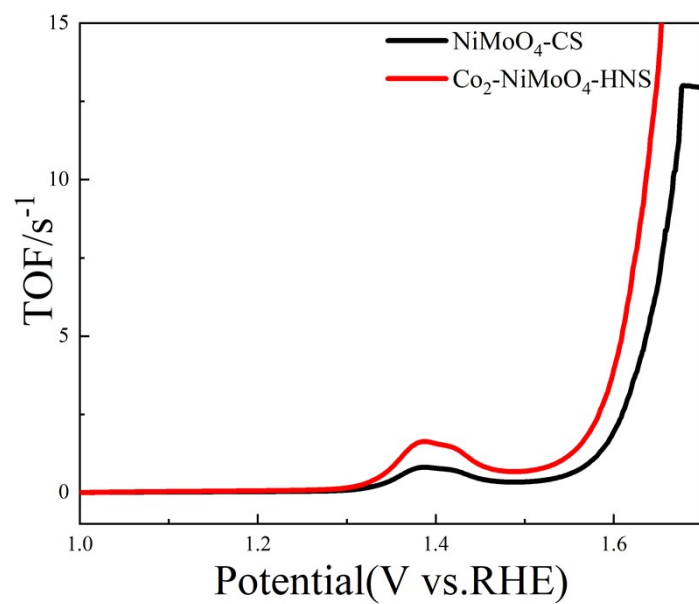

**Figure S10** TOF of  $\text{Co}_2\text{-NiMoO}_4\text{-HNS}$  and  $\text{NiMoO}_4\text{-CS}$ .

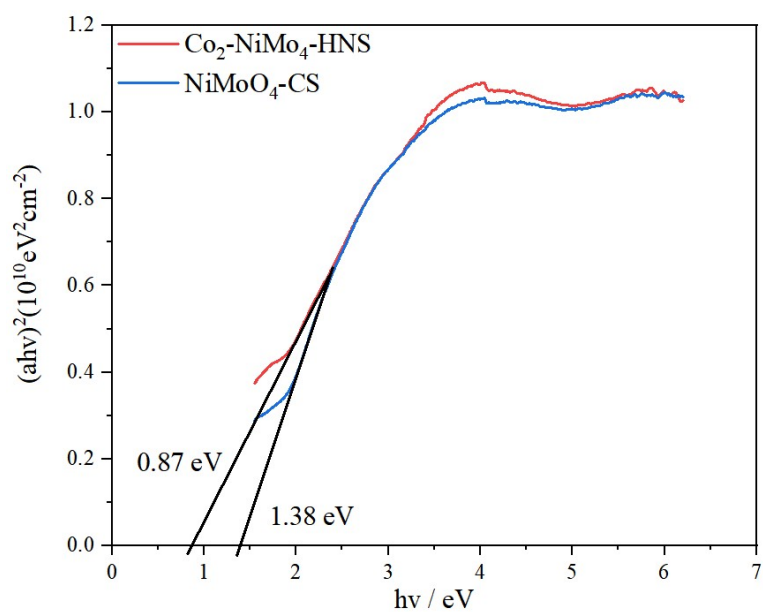

**Figure S11** The Kubelka-Munk plot for band gap energy of  $\text{Co}_2\text{-NiMoO}_4\text{-HNS}$  and  $\text{NiMoO}_4\text{-CS}$



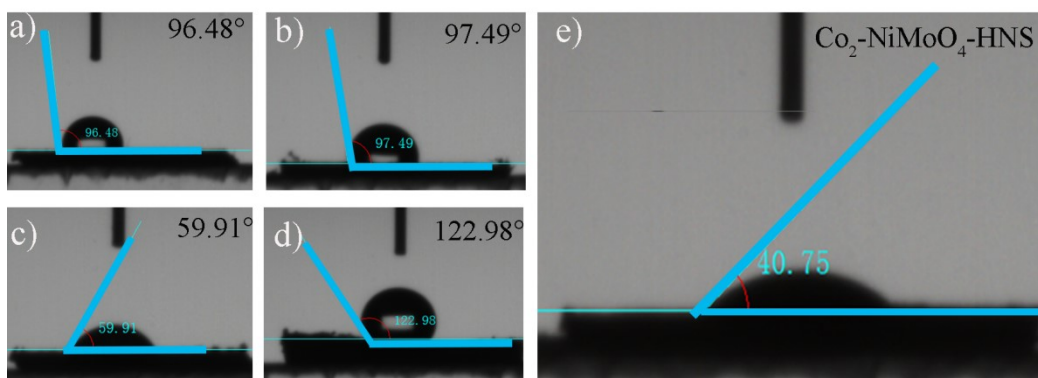

**Figure S12** Water contact angle images of a)  $\text{Co}_1\text{-NiMoO}_4\text{-HNS}$ , b)  $\text{Co}_2\text{-NiMoO}_4\text{-HNS}$ , c)  $\text{Co}_4\text{-NiMoO}_4\text{-HNS}$ , d)  $\text{Co}_6\text{-NiMoO}_4\text{-HNS}$ , e)  $\text{Co}_{1.5}\text{-NiMoO}_4\text{-HNS}$ .

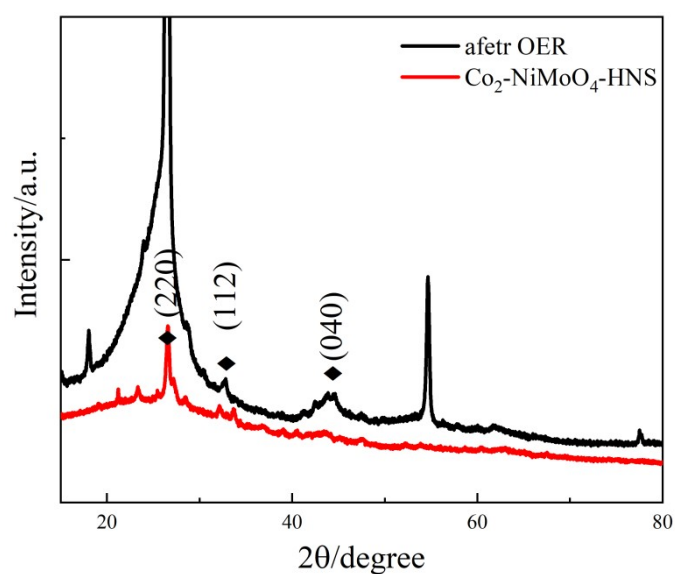

**Figure S13** XRD patterns of  $\text{Co}_2\text{-NiMoO}_4$  and after OER.

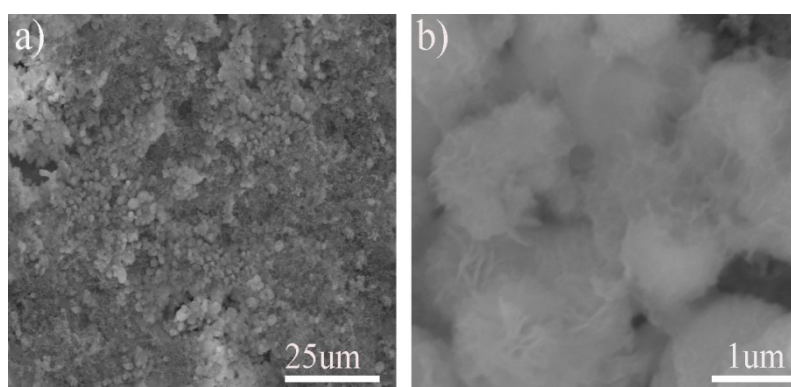

**Figure S14** SEM of  $\text{Co}_2\text{-NiMoO}_4\text{-HNS}$  after OER.



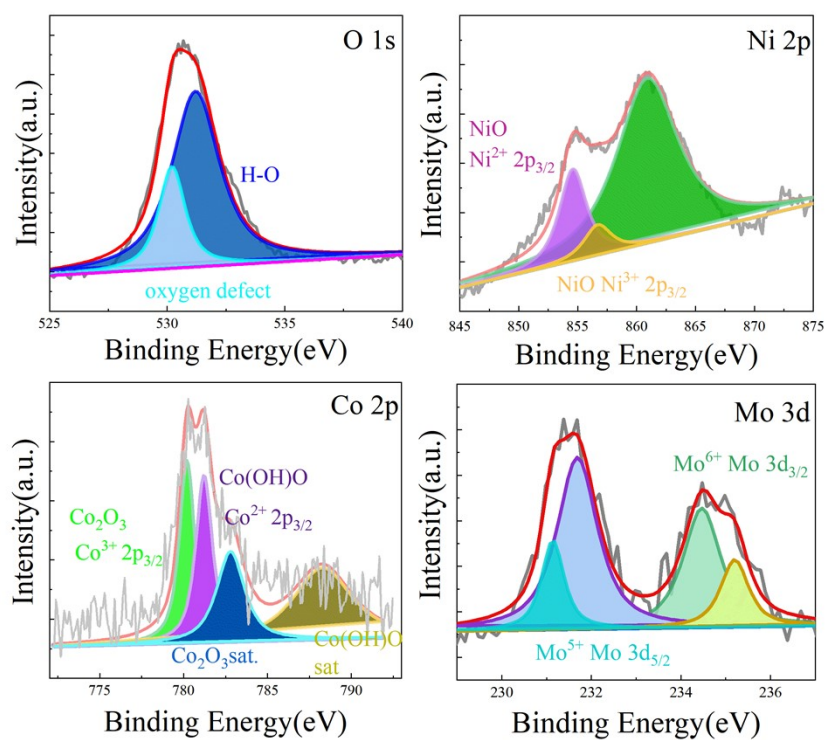

**Figure S15** a) high-resolution O 1s XPS spectra for Co<sub>2</sub>-NiMoO<sub>4</sub>-HNS after OER b) high-resolution Ni 2p XPS spectra for Co<sub>2</sub>-NiMoO<sub>4</sub>-HNS c) Co 2p d) Mo 3d.

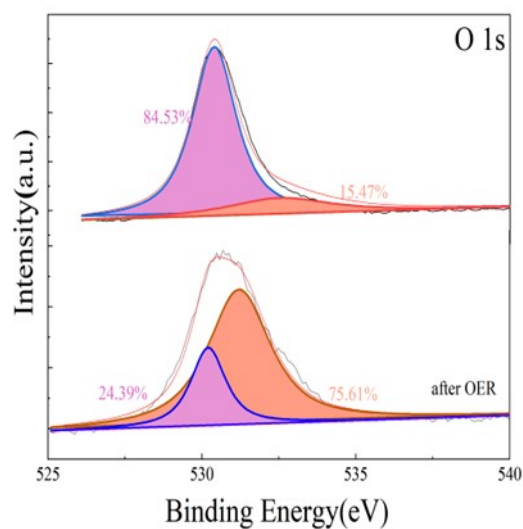

**Figure S16** High-resolution XPS spectra of O 1s

**Table S1.** Comparison of OER activity data among different catalysts.

| <b>Catalysts</b>                                     | <b>Overpotential at 10 mA cm<sup>-2</sup> (mV vs RHE)</b> | <b>Electrolyte concentration (pH)</b> | <b>Ref.</b> |
|------------------------------------------------------|-----------------------------------------------------------|---------------------------------------|-------------|
| <b>Co<sub>2</sub>-NiMoO<sub>4</sub>-HNS</b>          | 270                                                       | 14                                    | This work   |
| <b>Ni<sub>0.69</sub>Co<sub>0.31</sub>-P</b>          | 276                                                       | 13                                    | 1           |
| <b>CoOx-(a)</b>                                      | 390                                                       | 14                                    | 2           |
| <b>NiO</b>                                           | 420                                                       | 14                                    | 2           |
| <b>NiCoOx</b>                                        | 380                                                       | 14                                    | 2           |
| <b>NiMoN-550</b>                                     | 312                                                       | 14                                    | 3           |
| <b>Ni<sub>3</sub>FeN</b>                             | 280                                                       | 14                                    | 4           |
| <b>Co/N-C-800</b>                                    | 274                                                       | 14                                    | 5           |
| <b>Ni10-CoPi</b>                                     | 320                                                       | 14                                    | 5           |
| <b>Co<sub>2</sub>Fe-MOF</b>                          | 280                                                       | 14                                    | 5           |
| <b>Mn-NiMoO<sub>4</sub></b>                          | 330                                                       | 14                                    | 6           |
| <b>Co<sub>3</sub>O<sub>4</sub>@NiMoO<sub>4</sub></b> | >300                                                      | 14                                    | 7           |
| <b>NiO@MoO<sub>3</sub>/VC</b>                        | 280                                                       | 14                                    | 8           |
| <b>NiMoP@CoCH/CC-2</b>                               | >270                                                      | 14                                    | 9           |
| <b>NiMn LDHs</b>                                     | 350                                                       | 14                                    | 10          |
| <b>Co-NiMoN NRs</b>                                  | 294                                                       | 14                                    | 11          |
| <b>Mo<sub>2</sub>C@NC/Co@NG-900</b>                  | 420                                                       | 14                                    | 12          |
| <b>Co@Co<sub>3</sub>O<sub>4</sub>/NC-1</b>           | 410                                                       | 14                                    | 13          |

- [1] Yin, Z., Zhu, C., Li, C., Zhang, S., Zhang, X., & Chen, Y. (2016). Hierarchical nickel – cobalt phosphide yolk – shell spheres as highly active and stable bifunctional electrocatalysts for overall water splitting. *Nanoscale*, 8(45), 19129 – 19138. doi:10.1039/c6nr07009d
- [2] C. C. L. McCrory, S. Jung, J. C. Peters and T. F. Jaramillo, *J. Am. Chem. Soc.*, 2013, 135, 16977.
- [3] Z. X. Yin, Y. Sun, C. L. Zhu, C. Y. Li, X. T. Zhang, Y. J. Chen, *J. Mater. Chem. A* 2017, 5, 13648.
- [4] X. D. Jia, Y. F. Zhao, G. B. Chen, L. Shang, R. Shi, X. F. Kang, G. I. N. Waterhouse, L. Z. Wu, C. H. Tung, T. R. Zhang, *Adv. Energy Mater.* 2016, 6, 1502585.
- [5] Xi-Zheng Fan, Xin Du. In Situ Construction of Bifunctional N-Doped Carbon-Anchored Co Nanoparticles for OER and ORR *ACS Appl. Mater. Interfaces*, 2022, 14, 6, 8549 – 8556
- [6] Zhuoxun, Zhang, Chen, etc. Hybrid-atom-doped NiMoO<sub>4</sub> nanotubes for oxygen evolution reaction.
- [7] X. Q. Du, N. Li and X. S. Zhang, *Dalton Trans.*, 2018, 47, 12071.
- [8] R. Illathvalappil, L. George and S. Kurungot, *ACS Appl. Energy Mater.*, 2019, 2, 4987.
- [9] F. F. Wang, K. Ma, W. Tian, J. C. Dong, H. Han, H. P. Wang, K. Deng, H. R. Yue, Y. X. Zhang, W. Jiang and J. Y. Ji, *J. Mater. Chem. A*, 2019, 7, 19589.
- [10] A. Sumboja, J. W. Chen, Y. Zong, P. S. Lee and Z. L. Liu, *Nanoscale*, 2017, 9, 774.
- [11] Z. X. Yin, Y. Sun, Y. J. Jiang, F. Yan and C. L. Zhu, *ACS Appl. Mater. Interfaces*, 2019, 11, 27751.
- [12] Y. Wang, K. Y. Li, F. Yan, C. Y. Li, C. L. Zhu, X. T. Zhang and Y. J. Chen, *Nanoscale*, 2019, 11, 12563.
- [13] A. Aijaz, J. Masa, C. Rçsler, W. Xia, P. Weide, A. J. R. Botz, R. A. Fischer, W. Schuhmann and M. Muhler, *Angew. Chem., Int. Ed.*, 2016, 55, 4087.
